# Supplementary material for: Antioxidant Capacity and Antiplatelet Activity of Aqueous Extracts of Common Bean (Phaseolus vulgaris L.) Obtained with Microwave and Ultrasound Assisted Extraction
Source: MDPI journal article supplement (doi:10.3390/plants11091179), 2022-04-27
Supplement: s1 [file s1]

## Supporting Information

**Table S1.** Content of bioactive compounds for different varieties and extraction technique.

| Bioactive compound | Content (reference)                       | Variety                     | Extraction technique |
|--------------------|-------------------------------------------|-----------------------------|----------------------|
| Total phenolic     | 1364.5 mg GAE/g dw [1]                    | rojo                        | CSE                  |
|                    | 114.9 mg GAE/g dw [1]                     | blanco                      | CSE                  |
|                    | 1043.3 mg GAE/g dw [1]                    | pinto colorado              | CSE                  |
|                    | 550.1 to 787.5 mg GAE/g dw [1]            | negro (different varietyts) | CSE                  |
|                    | 451.9 mg GAE/g dw [1]                     | barreton                    | CSE                  |
|                    | 15.5 mg GAE/g coat [2]                    | negro                       | CSE                  |
|                    | 5.46 mg GAE/g coat [2]                    | Pinto Saltillo              | CSE                  |
|                    | 4.69 mg GAE/g dw/ 29.37 mg GAE/g coat [3] | Negro                       | MAE                  |
|                    | 5.77 mg GAE/g dw/ 39.98 mg GAE/g coat [3] | Small Red                   | MAE                  |
|                    | 1.86 mg GAE/g d/ 14.69 mg GAE/g coat [3]  | Negro                       | CSE                  |
|                    | 1.74 mg GAE/g dw/ 20.35 mg GAE/g coat [3] | Small Red                   | CSE                  |
|                    | 352.14 to 4664.92 mg GAE/100 mL [4]       | Black Soybean               | MAE                  |
|                    | 4871 mg GAE/100 g DW [5]                  | Pinto Kidney                | CSE                  |
|                    | 165.524 µg GAE/gr (DW) [6]                | Volturara                   | CSE                  |
|                    | 997.774 µg GAE/gr (DW) [6]                | Zampognaro                  | CSE                  |
|                    | 1150.474 µg GAE/gr (DW) [6]               | Screziato impalato          | CSE                  |
|                    | 1291.62 µg GAE/gr (DW) [6]                | Nero di Caposele            | CSE                  |
|                    | 20.49 to 31.31 mg GAE/g [7]               | Mung                        | UAE                  |

|                    |                                                              |                                |     |
|--------------------|--------------------------------------------------------------|--------------------------------|-----|
|                    | 0.59 to 29.58 mg GAE/g<br>[8]                                | Mung                           | CSE |
|                    | 0.40 to 54.45 mg GAE/g<br>[8]                                | Adzuki                         | CSE |
| <b>Flavonoid</b>   | 19.9 mg QE/g dw<br>[1]                                       | rojo                           | CSE |
|                    | 1.1 mg QE/g dw<br>[1]                                        | blanco                         | CSE |
|                    | 5.7 mg QE/g dw<br>[1]                                        | pinto colorado                 | CSE |
|                    | 5.6 to 18.6 mg QE/g dw [1]                                   | negro (different<br>varietyts) | CSE |
|                    | 1.2 mg QE/g dw<br>[1]                                        | barreton                       | CSE |
|                    | 0.083 mg RUE/g coat<br>[2]                                   | Pinto Saltillo                 | CSE |
|                    | 1116.94 to 12310.78 mg QE/L<br>[4]                           | Black Soybean                  | MAE |
|                    | 4477 mg CE/100 g DW<br>[5]                                   | Pinto                          | CSE |
|                    | 3529 mg CE/100 g DW<br>[5]                                   | small speckled<br>kidney       | CSE |
|                    | 51.511 µg (QE)/gr (DW)<br>[6]                                | Volturara                      | CSE |
|                    | 562378 µg (QE)/gr (DW)<br>[6]                                | Zampognaro                     | CSE |
|                    | 703.336 µg (QE)/gr (DW)<br>[6]                               | Screziato<br>impalato          | CSE |
|                    | 542.337 µg (QE)/gr (DW)<br>[6]                               | Nero di<br>Caposele            | CSE |
|                    | 0.39 to 0.71 mg CE/g<br>[6]                                  | Mung                           | UAE |
|                    | 0.40 to 22.08 mg CE/g<br>[6]                                 | Mung                           | CSE |
|                    | 0.38 to 50.78 mg CE/g<br>[6]                                 | Adzuki                         | CSE |
| <b>Anthocyanin</b> | 0.59 mg cyaniding 3-glucoside/g<br>seed coat<br>[1]          | rojo                           | CSE |
|                    | 0.69 mg cyaniding 3-glucoside/g<br>seed coat<br>[1]          | pinto colorado                 | CSE |
|                    | 2.82 to 9.42 mg cyaniding 3-<br>glucoside/g seed coat<br>[1] | negro (different<br>varietyts) | CSE |

|              |                                                     |                                |     |
|--------------|-----------------------------------------------------|--------------------------------|-----|
|              | 0.10 mg cyaniding 3-glucoside/g<br>seed coat<br>[1] | barreton                       | CSE |
|              | 206.0 to 250.0 mg/100 g coat<br>[2]                 | negro (different<br>varietyts) | CSE |
|              | 3.0 mg/100 g coat<br>[2]                            | FM-Eugenia                     | CSE |
|              | 876.68 to 5891.23 mg/L<br>[4]                       | Black Soybean                  | MAE |
|              | 5.37 mg CE/g DW<br>[5]                              | Kidney                         | CSE |
|              | 28.0 to 158 mg CE/g DW<br>[5]                       | Pinto                          | CSE |
|              | 10.706 µg (C3GE)/gr (DW)<br>[6]                     | Zampognaro                     | CSE |
|              | 7.255 µg (C3GE)/gr (DW)<br>[6]                      | Screziato<br>impalato          | CSE |
|              | 63.278 µg (C3GE)/gr (DW)<br>[6]                     | Nero di<br>Caposele            | CSE |
| <hr/>        |                                                     |                                |     |
| <b>Tanin</b> | 3.40 mg CAE/g dw<br>[1]                             | rojo                           | CSE |
|              | 0.53 mg CAE/g dw<br>[1]                             | blanco                         | CSE |
|              | 1.42 mg CAE/g dw<br>[1]                             | pinto colorado                 | CSE |
|              | 1.62 to 5.57 mg CAE/g dw<br>[1]                     | negro (different<br>varietyts) | CSE |
|              | 0.80 mg CAE/g dw<br>[1]                             | barreton                       | CSE |
|              | 60.6 mg GAE/g coat<br>[2]                           | Pinto Saltillo                 | CSE |
|              | 6.81 to 52.64 mg CE/g<br>[8]                        | Mung                           | CSE |
|              | 3.59 to 97.42 mg CE/g<br>[8]                        | Adzuki                         | CSE |

**Table S2.** Antiplatelet activity of 25 varieties of *P. vulgaris* L.

| Extracts       |     | TRAP-6 10µM              |              |             | ADP 4µM                  |              |               |
|----------------|-----|--------------------------|--------------|-------------|--------------------------|--------------|---------------|
|                |     | PA (%)                   | AUC          | Slope       | PA (%)                   | AUC          | Slope         |
| Arauco         | MAE | 26,8 ± 1,2 ***           | 41,8 ± 3,4   | 47,8 ± 2,0  | 71,3 ± 1,5 *             | 286 ± 10,6   | 82,6 ± 1,4    |
|                | UAE | 49,1 ± 3,5 ***           | 296,2 ± 1,4  | 27,1 ± 3,4  | 71 ± 2,5 **              | 295,4 ± 1,1  | 81,2 ± 6,8    |
| Blanco Español | MAE | 23,8 ± 2,6 ***           | 133,4 ± 28   | 53,8 ± 5,4  | 75,7 ± 2,2 <sup>ns</sup> | 295,2 ± 1,1  | 108,2 ± 3,9   |
|                | UAE | 36,2 ± 3,0 ***           | 182,4 ± 28,8 | 46,8 ± 6,3  | 71,5 ± 3,0 **            | 295,6 ± 0,8  | 66,5 ± 7,4    |
| Bombero        | MAE | 77,5 ± 3,1 <sup>ns</sup> | 284,2 ± 2,7  | 100,8 ± 6,9 | 92,3 ± 0,8 <sup>ns</sup> | 309,8 ± 5,1  | 75,2 ± 5,1    |
|                | UAE | 17,8 ± 2,4 ***           | 128,8 ± 19,2 | 52,2 ± 3,9  | 71,5 ± 2,4 **            | 286,4 ± 16,7 | 62,7 ± 4,5    |
| Cabrita        | MAE | 36,3 ± 3,1 ***           | 297,4 ± 0,5  | 13,4 ± 2,2  | 84,7 ± 0,8 <sup>ns</sup> | 295,6 ± 0,9  | 78,4 ± 6,6    |
|                | UAE | 65 ± 3,2 *               | 292 ± 1,8    | 39,1 ± 3,6  | 87,9 ± 1,4 <sup>ns</sup> | 299,6 ± 0,1  | 75,8 ± 1,0    |
| Cimarrón       | MAE | 79,1 ± 3,4 <sup>ns</sup> | 314,2 ± 15   | 83,4 ± 8,0  | 73,8 ± 3,8 *             | 270 ± 7,4    | 77,9 ± 6,8    |
|                | UAE | 78,6 ± 2,4 <sup>ns</sup> | 278,2 ± 9,4  | 57,1 ± 10,9 | 84,2 ± 1,3 <sup>ns</sup> | 298,2 ± 0,8  | 55,3 ± 1,8    |
| Cisne          | MAE | 60,1 ± 4,1 **            | 289,4 ± 3,4  | 77,4 ± 2,0  | 80,8 ± 2,5 <sup>ns</sup> | 294,8 ± 0,1  | 506,7 ± 114,2 |
|                | UAE | 72,4 ± 3,7 <sup>ns</sup> | 291 ± 1,1    | 32,9 ± 4,5  | 86,5 ± 1,2 <sup>ns</sup> | 296,8 ± 0,3  | 53,9 ± 1,5    |

|                       |            |                          |              |             |                          |             |              |
|-----------------------|------------|--------------------------|--------------|-------------|--------------------------|-------------|--------------|
| <b>Coscorrón</b>      | <b>MAE</b> | 7,9 ± 0,4 ***            | 83,6 ± 23,3  | 31,6 ± 1,4  | 73,8 ± 1,9 *             | 222 ± 21,4  | 106,9 ± 12,2 |
|                       | <b>UAE</b> | 54,9 ± 1,0 ***           | 292,6 ± 1,4  | 46,9 ± 12,1 | 84,8 ± 0,8 <sup>ns</sup> | 296,2 ± 1,1 | 58 ± 1,9     |
| <b>Frutilla</b>       | <b>MAE</b> | 21,3 ± 1,1 ***           | 134,8 ± 28,8 | 47,5 ± 4,3  | 82,1 ± 1,8 <sup>ns</sup> | 298,4 ± 0,1 | 52 ± 6,3     |
|                       | <b>UAE</b> | 50,3 ± 1,7 ***           | 287,4 ± 1,6  | 48,5 ± 2,7  | 85,4 ± 0,6 <sup>ns</sup> | 295 ± 1,3   | 97,5 ± 3,8   |
| <b>Ganso</b>          | <b>MAE</b> | 17,1 ± 2,7 ***           | 132,2 ± 28,5 | 45,6 ± 4,9  | 74,1 ± 1,2 *             | 283 ± 4,4   | 41,5 ± 8,6   |
|                       | <b>UAE</b> | 69,8 ± 3,9 <sup>ns</sup> | 276,6 ± 8,6  | 23,1 ± 2,5  | 82,3 ± 0,7 <sup>ns</sup> | 287,6 ± 2,3 | 38,5 ± 0,8   |
| <b>Hallado Alemán</b> | <b>MAE</b> | 85,8 ± 0,7 <sup>ns</sup> | 254 ± 17,9   | 126,3 ± 7,9 | 81,8 ± 1,2 <sup>ns</sup> | 300 ± 1,8   | 100,4 ± 9,8  |
|                       | <b>UAE</b> | 11 ± 0,9 ***             | 31,6 ± 0,8   | 40,1 ± 2,4  | 73,3 ± 2,9 <sup>ns</sup> | 290,8 ± 2,2 | 89,8 ± 7,7   |
| <b>Lunatus</b>        | <b>MAE</b> | 86,8 ± 0,8 <sup>ns</sup> | 250,6 ± 22,5 | 78,4 ± 4,1  | 90,8 ± 0,4 <sup>ns</sup> | 314,4 ± 6,9 | 62,2 ± 1,1   |
|                       | <b>UAE</b> | 7,8 ± 1,4 ***            | 28,6 ± 1,3   | 32,5 ± 3,4  | 72,6 ± 1,6 **            | 276,6 ± 3,9 | 103,7 ± 7,6  |
| <b>Manteca</b>        | <b>MAE</b> | 55,2 ± 1,3 ***           | 297,4 ± 0,4  | 29,3 ± 2,1  | 79,8 ± 1,4 <sup>ns</sup> | 297,6 ± 0,5 | 33 ± 1,0     |
|                       | <b>UAE</b> | 78,5 ± 2,9 <sup>ns</sup> | 298 ± 0,6    | 39 ± 1,9    | 87,9 ± 1,2 <sup>ns</sup> | 295,6 ± 0,6 | 46,6 ± 1,0   |
| <b>Mantequilla</b>    | <b>MAE</b> | 22,3 ± 1,8 ***           | 34,8 ± 5,9   | 45,9 ± 5,8  | 76,7 ± 2,4 <sup>ns</sup> | 327,8 ± 13  | 77,2 ± 4,9   |
|                       | <b>UAE</b> | 56,3 ± 1,3 ***           | 300 ± 0      | 26,3 ± 2,0  | 76,4 ± 1,8 <sup>ns</sup> | 300,8 ± 6,4 | 57,3 ± 1,8   |
| <b>Negro</b>          | <b>MAE</b> | 7,8 ± 1,2 ***            | 34,8 ± 1,4   | 35,6 ± 3,2  | 73,6 ± 2,0 *             | 284,8 ± 5,1 | 88,1 ± 6,6   |
|                       | <b>UAE</b> | 25,3 ± 1,4 ***           | 329,4 ± 76,9 | 70,8 ± 2,6  | 84 ± 0,9 <sup>ns</sup>   | 296,4 ± 0,8 | 144,5 ± 3,1  |

|                        |            |                          |              |            |                          |              |             |
|------------------------|------------|--------------------------|--------------|------------|--------------------------|--------------|-------------|
| <b>Negro Arauco</b>    | <b>MAE</b> | 28,5 ± 2,8 ***           | 83 ± 16,3    | 63,8 ± 2,9 | 72,8 ± 2,0 *             | 297,6 ± 0,8  | 84,6 ± 8,0  |
|                        | <b>UAE</b> | 47 ± 1,7 ***             | 198,2 ± 0,2  | 21,9 ± 1,5 | 78 ± 1,4 <sup>ns</sup>   | 291,8 ± 1,4  | 47,1 ± 5,6  |
| <b>Pajarito</b>        | <b>MAE</b> | 56,7 ± 0,9 ***           | 298,6 ± 0,3  | 21,2 ± 1,8 | 84,1 ± 1,1 <sup>ns</sup> | 298 ± 0,5    | 53,2 ± 3,2  |
|                        | <b>UAE</b> | 78 ± 2,8 <sup>ns</sup>   | 294 ± 1,9    | 56,8 ± 4,6 | 87,7 ± 1,3 <sup>ns</sup> | 297,6 ± 0,3  | 60,3 ± 4,8  |
| <b>Palo</b>            | <b>MAE</b> | 85,4 ± 0,3 <sup>ns</sup> | 417 ± 15,5   | 91,6 ± 4,5 | 81 ± 3,3 <sup>ns</sup>   | 382,8 ± 19,4 | 59,2 ± 2,4  |
|                        | <b>UAE</b> | 23,5 ± 1,5 ***           | 249 ± 13     | 28,2 ± 3,2 | 71,1 ± 3,4 **            | 299,2 ± 0,2  | 60,6 ± 1,6  |
| <b>Pallar Manchado</b> | <b>MAE</b> | 20,9 ± 1,0 ***           | 29,2 ± 0,6   | 54,4 ± 5,2 | 88 ± 1,3 <sup>ns</sup>   | 295,4 ± 0,9  | 106,6 ± 2,9 |
|                        | <b>UAE</b> | 18,7 ± 1,1 ***           | 298,2 ± 0,4  | 21 ± 1,3   | 74 ± 0,6 *               | 296 ± 1,0    | 73,6 ± 2,5  |
| <b>Pallar Morado</b>   | <b>MAE</b> | 31,9 ± 0,6 ***           | 70 ± 6,6     | 66,6 ± 3,4 | 73,5 ± 2,6*              | 290,8 ± 0,9  | 101 ± 2,0   |
|                        | <b>UAE</b> | 20,8 ± 1,0 ***           | 235,4 ± 25,8 | 30 ± 3,3   | 68 ± 1,6 ***             | 296,2 ± 0,8  | 76,1 ± 1,7  |
| <b>Peumo</b>           | <b>MAE</b> | 46,1 ± 6,2 ***           | 150,4 ± 33,6 | 70,7 ± 4,0 | 81,8 ± 1,9 <sup>ns</sup> | 305,6 ± 4,7  | 110,6 ± 7,8 |
|                        | <b>UAE</b> | 81,7 ± 1,7 <sup>ns</sup> | 328,4 ± 25,9 | 45,9 ± 8,3 | 82,9 ± 0,5 <sup>ns</sup> | 339 ± 15,9   | 50,2 ± 2,4  |
| <b>Rojo</b>            | <b>MAE</b> | 35,5 ± 2,7 ***           | 135,6 ± 27,8 | 70,1 ± 3,5 | 75 ± 2,0 *               | 288,2 ± 2,8  | 110,1 ± 3,5 |
|                        | <b>UAE</b> | 57,1 ± 7,5 ***           | 299,8 ± 12,6 | 88,8 ± 4,1 | 69 ± 7,0 ***             | 287 ± 9,1    | 106 ± 8,9   |
| <b>Sapito</b>          | <b>MAE</b> | 69,6±4,7*                | 385±19       | 99±15      | 69,0±4,8*                | 308±12       | 72±11       |
|                        | <b>UAE</b> | 79,4 ± 3,0 <sup>ns</sup> | 297,6 ± 0,7  | 50,9 ± 5,7 | 87,8 ± 0,9 <sup>ns</sup> | 298 ± 0,4    | 44,3 ± 3,1  |

|                |            |                          |              |            |                          |              |            |
|----------------|------------|--------------------------|--------------|------------|--------------------------|--------------|------------|
| <b>Soja</b>    | <b>MAE</b> | 22,4 ± 2,8 ***           | 98,4 ± 20,3  | 53,7 ± 3,2 | 75,2 ± 2,2 *             | 312,6 ± 6,9  | 93 ± 4,6   |
|                | <b>UAE</b> | 28,1 ± 2,9 ***           | 28,4 ± 1,1   | 71 ± 4,7   | 74 ± 1,9 *               | 255,2 ± 13,5 | 62 ± 1,9   |
| <b>Torcaza</b> | <b>MAE</b> | 27,5 ± 2,0 ***           | 116,2 ± 22,6 | 54,5 ± 3,0 | 78,7 ± 3,4 <sup>ns</sup> | 285,2 ± 12,4 | 50,5 ± 2,5 |
|                | <b>UAE</b> | 48 ± 0,7 ***             | 253 ± 9,6    | 44,5 ± 3,1 | 66,2 ± 3,9 ***           | 259 ± 11,6   | 52,7 ± 3,8 |
| <b>Tórtola</b> | <b>MAE</b> | 12 ± 1,3 ***             | 48,2 ± 7,4   | 38,1 ± 2,3 | 78,2 ± 1,7 <sup>ns</sup> | 241,6 ± 23,3 | 72,1 ± 6,8 |
|                | <b>UAE</b> | 75,6 ± 2,9 <sup>ns</sup> | 298,6 ± 0,5  | 35,7 ± 3,8 | 80,8 ± 1,2 <sup>ns</sup> | 294 ± 1,0    | 40,2 ± 3,1 |
| <b>Control</b> |            | 80,5 ± 1,9               | 301,6 ± 4,5  | 35,7 ± 3,8 | 85,1 ± 1,2               | 299 ± 3,0    | 49,2 ± 5,1 |

Data are expressed as mean ± SD, n=5, and analyzed using one-way ANOVA. Post hoc analyzes were performed using the Dunnet test, \* p < 0.05, \*\* p < 0.01 and \*\*\* p < 0.001 denotes a statistically significant difference compared to vehicle; ns: non-statistical difference compared to vehicle. AUC: Area under the curve; MAE: Microwave-assisted extraction; PA: Percentage of platelet aggregation; UAE: Ultrasound-assisted extraction.

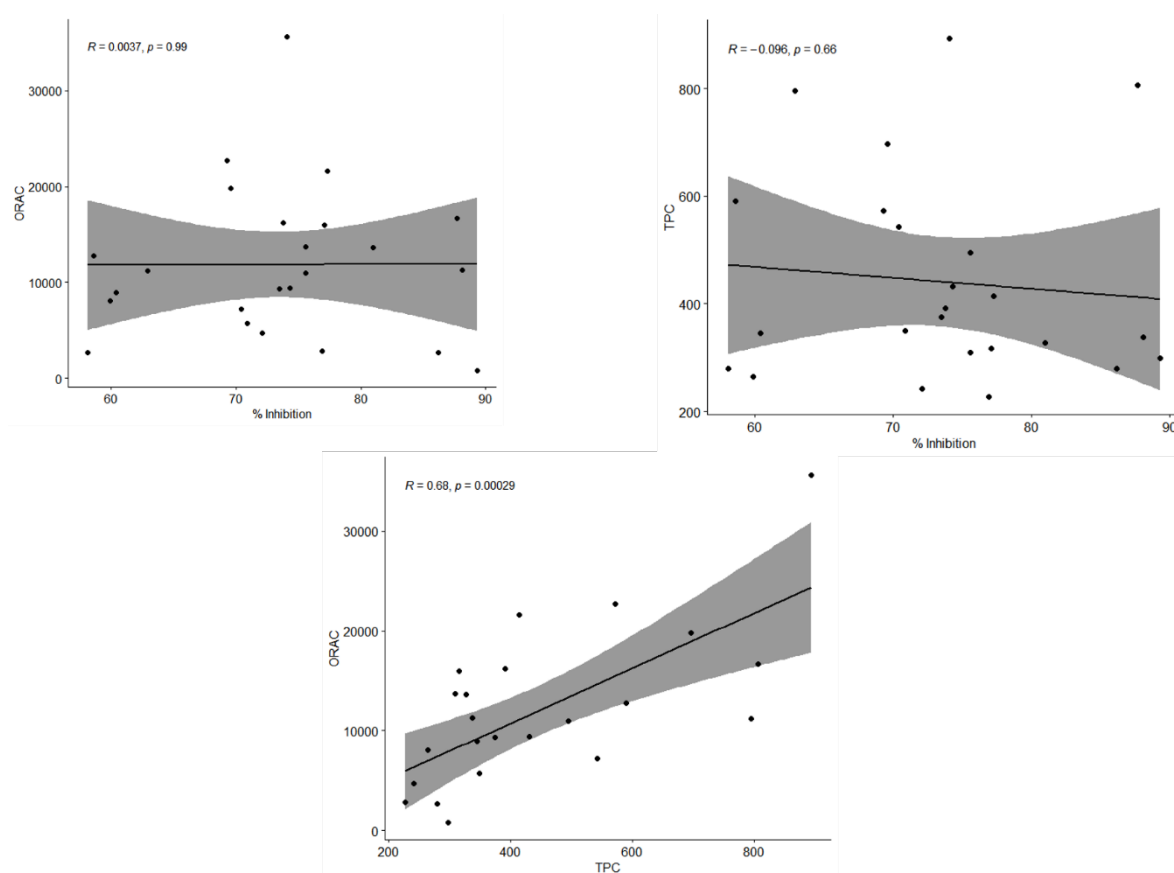

**Figure S1.** Correlation between phenol content, antioxidant activity, and antiplatelet activity of extracts *P. vulgaris* L.

## References

1. Alcázar-Valle, M., et al., *Bioactive compounds, antioxidant activity, and antinutritional content of legumes: a comparison between four phaseolus species*. 2020. **25**(15): p. 3528.
2. Mojica, L., et al., *Bean cultivars (*Phaseolus vulgaris* L.) have similar high antioxidant capacity, in vitro inhibition of  $\alpha$ -amylase and  $\alpha$ -glucosidase while diverse phenolic composition and concentration*. 2015. **69**: p. 38-48.
3. Sutivisedsak, N., et al., *Microwave-assisted extraction of phenolics from bean (*Phaseolus vulgaris* L.)*. 2010. **43**(2): p. 516-519.
4. Kumar, M., et al., *Evaluation of enzyme and microwave-assisted conditions on extraction of anthocyanins and total phenolics from black soybean (*Glycine max* L.) seed coat*. 2019. **135**: p. 1070-1081.
5. Yang, Q.Q., et al., *Polyphenols in common beans (*Phaseolus vulgaris* L.): Chemistry, analysis, and factors affecting composition*. *Comprehensive Reviews in Food Science and Food Safety*, 2018. **17**(6): p. 1518-1539.



6. Ombra, M.N., et al., *Phenolic composition and antioxidant and antiproliferative activities of the extracts of twelve common bean (Phaseolus vulgaris L.) endemic ecotypes of Southern Italy before and after cooking*. 2016. **2016**.
7. Singh, B., et al., *Ultrasound assisted extraction of polyphenols and their distribution in whole mung bean, hull and cotyledon*. 2017. **54(4)**: p. 921-932.
8. Luo, J., et al., *Phytochemical distribution in hull and cotyledon of adzuki bean (Vigna angularis L.) and mung bean (Vigna radiate L.), and their contribution to antioxidant, anti-inflammatory and anti-diabetic activities*. 2016. **201**: p. 350-360.
